# Supplementary material for: Facile synthesis of rutile TiO2 nanorod microspheres for enhancing light-harvesting of dye-sensitized solar cells
Source: Royal Society of Chemistry journal article supplement (doi:10.1039/c2ce26691a), 2012-12-17
Supplement: c2ce26691a.pdf [file c2ce26691a.pdf]

## Electronic Supplementary Information

### Facile synthesis of rutile TiO<sub>2</sub> nanorod microspheres for enhancing light-harvesting of dye-sensitized solar cells

Yichuan Rui,<sup>a</sup> Yaogang Li,<sup>b</sup> Qinghong Zhang<sup>b\*</sup> and Hongzhi Wang<sup>a\*</sup>

<sup>a</sup> State Key Laboratory for Modification of Chemical Fibers and Polymer Materials, Donghua University, Shanghai 201620, P. R. China E-mail: wanghz@dhu.edu.cn; Fax: +86-021-67792855; Tel: +86-021-67792881

<sup>b</sup> Engineering Research Center of Advanced Glasses Manufacturing Technology, MOE, Shanghai 201620, P. R. China. E-mail: zhangqh@dhu.edu.cn; Fax: +86-021-67792855; Tel: +86-021-67792943

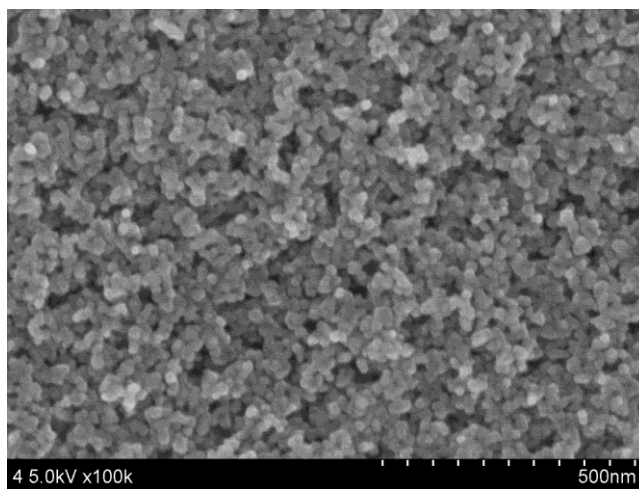

**Fig. S1** FESEM image of the nanocrystalline TiO<sub>2</sub> for the underlayer of the photoanode.

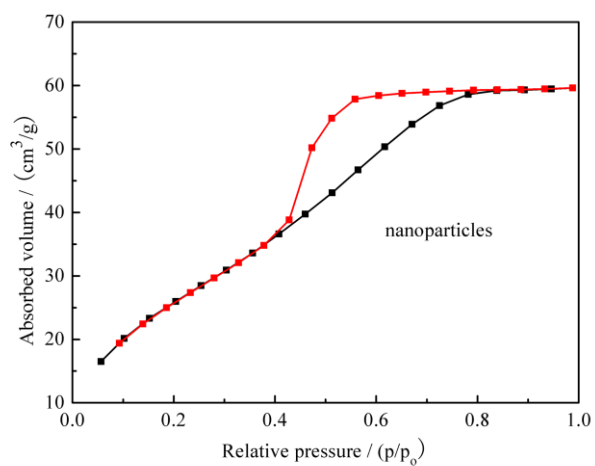

**Fig. S2** Nitrogen adsorption–desorption isotherm of the nanocrystalline TiO<sub>2</sub>.

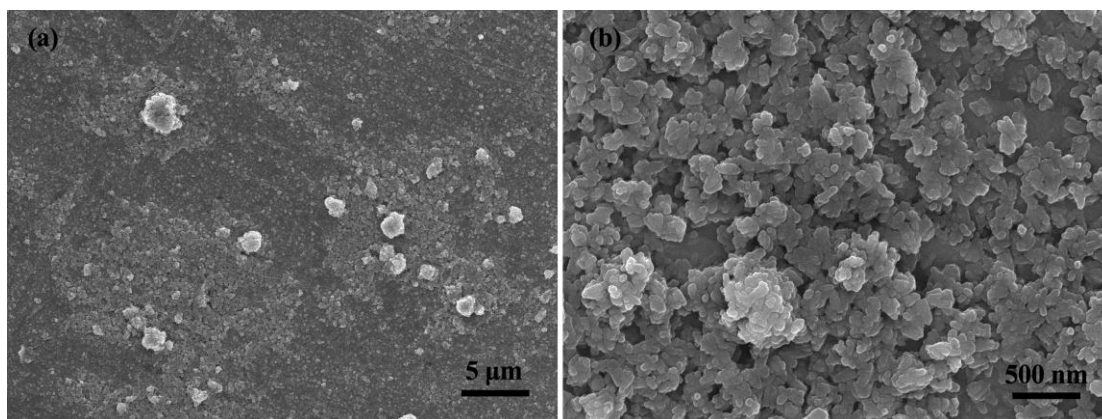

**Fig. S3** (a) Low and (b) high magnification FESEM images of the sample obtained in the absence of NaCl.
